# Supplementary material for: Assessment of Colistin Heteroresistance among Multidrug-Resistant Klebsiella pneumoniae Isolated from Intensive Care Patients in Europe
Source: MDPI journal article supplement (doi:10.3390/antibiotics13030281), 2024-03-20
Supplement: s1 [file s1]

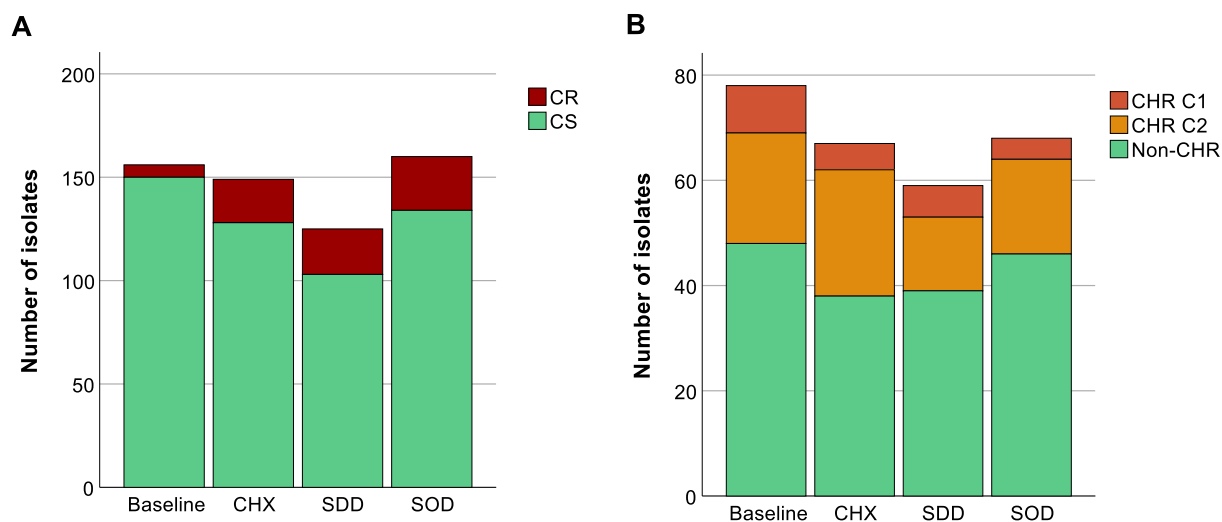

**Figure S1:** Distribution of isolates across baseline and intervention strategies. Graphs show the number of isolates per strategy as well as the number of colistin-resistant (CR)/colistin-heteroresistant (CHR) and colistin-susceptible (CS)/non-CHR isolates. Of note, Classification 1 (C1) + Classification 2 (C2) represents the total amount of isolates fulfilling C2 whilst C2 alone represents isolates only fulfilling C2. **(A)** CR per intervention strategy, **(B)** CHR per intervention strategy. CHX = chlorhexidine digluconate, SOD = selective oropharyngeal decontamination, SDD = selective digestive tract decontamination.
