# Supplementary material for: Assessment of Colistin Heteroresistance among Multidrug-Resistant Klebsiella pneumoniae Isolated from Intensive Care Patients in Europe
Source: MDPI journal article supplement (doi:10.3390/antibiotics13030281), 2024-03-20
Supplement: s1 [file s1]

**Table S2:** Overview of selected isolates. Table offers an overview of the selected isolates ( $n = 288$ ) and their characteristics. BEL = Belgium, ESP = Spain, UK = United Kingdom, SVN = Slovenia, ITA = Italy, PRT = Portugal, Cat. = category, Surv = surveillance, PPS = point prevalence survey, Clin = clinical, CHX = chlorhexidine digluconate, SOD = selective oropharyngeal decontamination, SDD = selective digestive tract decontamination, ST = sequence type, K-antigen type = capsular polysaccharide antigen type, O-antigen type = lipopolysaccharide antigen type, Col MIC = colistin minimum inhibitory concentration, CHR = colistin-heteroresistant, MDR = multidrug-resistant, CP = carbapenemase producing, Undef. = undefined, ND = no data.

| Isolate ID | Country | Cat. | Intervention | ST   | K-antigen type | O-antigen type | Col MIC (mg/L) | C<br>H<br>R | M<br>D<br>R | C<br>P |
|------------|---------|------|--------------|------|----------------|----------------|----------------|-------------|-------------|--------|
| AN0157O    | BEL     | Surv | Baseline     | 11   | KL105          | O2v2           | 0.25           | 2           | +           | +      |
| AN0222CP   | BEL     | Surv | Baseline     | 530  | KL54           | O1/O2v2        | 0.5            | -           | -           | -      |
| AN0328E    | BEL     | Surv | Baseline     | 323  | KL21           | O3b            | 0.5            | -           | +           | -      |
| AN0980CP   | BEL     | Surv | Baseline     | 504  | KL110          | O1v1           | 0.5            | 2           | +           | -      |
| AN1092CP1  | BEL     | Surv | Baseline     | 160  | KL62           | O1v1           | 0.25           | -           | +           | -      |
| AN1505CP2  | BEL     | Surv | SDD          | 323  | KL21           | O3b            | 1              | 1           | +           | -      |
| AN1876CP2  | BEL     | PPS  | SDD          | 2004 | KL23           | O2v2           | 1              | -           | +           | -      |
| AN2029CP   | BEL     | Surv | SDD          | 34   | KL38           | O3b            | 0.5            | -           | -           | -      |
| AN2262CP   | BEL     | PPS  | SDD          | 219  | KL114          | O1/O2v1        | 1              | -           | +           | -      |
| AN2496CP   | BEL     | PPS  | SDD          | 15   | KL62           | O1v1           | 0.25           | 2           | +           | -      |
| AN2784CP   | BEL     | Surv | SDD          | 13   | KL3            | O1v2           | 0.5            | 2           | +           | -      |
| AN2982CP   | BEL     | Surv | SDD          | 323  | KL21           | O3b            | 1              | -           | +           | -      |
| AN2991E2   | BEL     | Surv | SDD          | 3031 | KL124          | O3/O3a         | 0.5            | -           | -           | -      |
| AN3090CP   | BEL     | Surv | SDD          | 323  | KL21           | O3b            | 0.5            | -           | +           | -      |
| AN3573CP   | BEL     | Surv | CHX          | 45   | KL24           | O2v1           | 1              | 1           | +           | +      |
| AN3603CP   | BEL     | Surv | CHX          | 147  | KL64           | O2v1           | 0.5            | 2           | +           | -      |
| AN4337CP2  | BEL     | Surv | CHX          | 1709 | KL70           | OL102          | 0.25           | -           | -           | -      |
| AN4440CP   | BEL     | Surv | CHX          | 513  | KL14           | O3b            | 0.5            | -           | +           | -      |
| AN5000CP   | BEL     | PPS  | SOD          | 39   | KL149          | O1v2           | 0.5            | -           | -           | -      |
| AN5043CP   | BEL     | Surv | Wash-in/out  | 13   | KL3            | O1v2           | 1              | -           | +           | +      |
| AN5207CP   | BEL     | PPS  | SOD          | 307  | KL102          | O2v2           | 1              | -           | +           | -      |
| AN5764E    | BEL     | Surv | SOD          | 307  | KL102          | O2v2           | 0.25           | -           | +           | -      |
| AN6344CP   | BEL     | PPS  | SOD          | 15   | KL62           | O1v1           | 0.125          | 2           | +           | -      |
| AN6484CP   | BEL     | PPS  | SOD          | 872  | KL153          | O2v2           | 0.25           | -           | -           | -      |
| AN6502E    | BEL     | Surv | SOD          | 884  | KL150          | O3b            | 1              | -           | +           | -      |
| AN6511CP   | BEL     | Surv | SOD          | 323  | KL21           | O3b            | 0.25           | -           | +           | -      |
| AN6607CP   | BEL     | Surv | Wash-in/out  | 1876 | KL15           | O4             | 0.25           | -           | -           | -      |
| BC0043     | ESP     | Surv | Baseline     | 147  | KL64           | O2v1           | 1              | -           | +           | -      |
| BC0133CP   | ESP     | PPS  | Baseline     | 101  | KL17           | O1v1           | 0.25           | -           | +           | +      |
| BC0275CP   | ESP     | PPS  | CHX          | 1083 | KL132          | O1v1           | 0.5            | 2           | +           | +      |
| BC0294E    | ESP     | Surv | CHX          | 323  | KL21           | O3b            | 0.25           | -           | +           | -      |
| BC0365     | ESP     | Surv | CHX          | 392  | KL27           | O4             | 1              | -           | +           | -      |
| BC0386     | ESP     | PPS  | CHX          | 485  | KL22           | O3b            | 1              | -           | +           | -      |
| BC0495     | ESP     | PPS  | CHX          | 101  | KL17           | O1v1           | 0.0625         | 2           | +           | +      |
| BC0501     | ESP     | PPS  | CHX          | 20   | KL28           | O1v2           | 1              | 2           | -           | -      |
| BC0504     | ESP     | Surv | CHX          | 101  | KL17           | O1v1           | 0.5            | 2           | +           | +      |
| BC0602     | ESP     | Surv | SDD          | 405  | KL151          | O4             | 1              | -           | +           | -      |
| BC0650     | ESP     | Surv | SDD          | 17   | KL25           | O5             | 0.5            | 2           | -           | -      |
| CD0391E    | UK      | Clin | Baseline     | 983  | KL127          | OL101          | 0.5            | -           | +           | -      |
| CD0687E    | UK      | Surv | Baseline     | 628  | KL123          | O3b            | 1              | -           | +           | -      |
| CD0692E    | UK      | Surv | SOD          | 37   | KL7            | OL104          | 0.5            | -           | ND          | -      |
| CD0794C/E  | UK      | Surv | SOD          | 340  | KL123          | O4             | 1              | -           | +           | -      |
| CD0833E    | UK      | Surv | SOD          | 20   | KL28           | O1v2           | 0.5            | 2           | +           | +      |
| CD0950CP   | UK      | Surv | SOD          | 20   | KL28           | O1v2           | 1              | -           | +           | +      |
| CD1069E    | UK      | Surv | SOD          | 628  | KL36           | O3b            | 1              | 2           | +           | -      |
| CD1221CP   | UK      | PPS  | SOD          | 14   | KL2            | O1/O2v1        | 0.5            | 2           | -           | -      |

|           |     |      |             |         |       |         |       |   |    |    |
|-----------|-----|------|-------------|---------|-------|---------|-------|---|----|----|
| CD1279O   | UK  | Surv | SOD         | 678     | KL15  | O4      | 2     | 1 | -  | -  |
| CD1506E   | UK  | Surv | CHX         | 45      | KL24  | O2v1    | 0.5   | - | +  | ND |
| CD1695E   | UK  | Surv | CHX         | 628     | KL123 | O3b     | 1     | - | +  | -  |
| CD1892E   | UK  | PPS  | CHX         | 15      | KL19  | O1/O2v2 | 1     | 1 | +  | -  |
| CD1901E   | UK  | Surv | CHX         | 48      | KL62  | O1v1    | 1     | 2 | +  | -  |
| CD2009E   | UK  | Surv | CHX         | 45      | KL24  | O2v1    | 0.5   | - | ND | -  |
| CD2110E   | UK  | PPS  | SDD         | 307     | KL102 | O2v2    | 1     | - | +  | -  |
| CD2409E   | UK  | Surv | SDD         | 628     | KL123 | O3b     | 0.5   | 2 | +  | -  |
| FE0004    | ESP | Surv | Baseline    | 3293    | KL60  | O3b     | 0.5   | - | +  | -  |
| FE0017    | ESP | Surv | Baseline    | 1427    | KL67  | OL101   | 0.25  | - | +  | -  |
| FE0022    | ESP | Surv | Baseline    | 1427    | KL67  | OL101   | 1     | - | +  | -  |
| FE0051    | ESP | Surv | Baseline    | 437     | KL36  | O4      | 0.5   | - | +  | -  |
| FE0117    | ESP | Surv | Baseline    | 391     | KL30  | O1v2    | 1     | 2 | +  | +  |
| FE0164    | ESP | PPS  | Baseline    | 405     | KL151 | O4      | 1     | 1 | +  | -  |
| FE0245    | ESP | PPS  | Baseline    | 76      | KL21  | O3/O3a  | 1     | 2 | +  | +  |
| FE0256    | ESP | Surv | Baseline    | 147     | KL64  | O2v1    | 0.5   | - | +  | +  |
| FE0389    | ESP | Surv | Baseline    | 11      | KL13  | OL104   | 0.5   | - | +  | -  |
| FE0467    | ESP | Surv | Baseline    | 437     | KL36  | O4      | 1     | - | +  | +  |
| FE0501    | ESP | Surv | Baseline    | 76      | KL21  | O3/O3a  | 1     | 2 | +  | +  |
| FE0710    | ESP | Surv | SDD         | 17      | KL66  | O2v2    | 2     | 2 | +  | +  |
| FE0777    | ESP | Surv | SDD         | 147     | KL64  | O2v1    | 2     | - | +  | -  |
| FE0780    | ESP | Surv | SDD         | 147     | KL64  | O2v1    | 1     | - | +  | -  |
| FE0820    | ESP | Surv | SDD         | 134     | KL25  | O5      | 1     | 2 | +  | +  |
| FE0883    | ESP | Surv | SDD         | 437     | KL36  | O4      | 0.5   | - | +  | +  |
| FE0992    | ESP | Clin | SDD         | 70      | KL136 | O1v2    | 0.5   | 2 | +  | -  |
| FE1068    | ESP | Surv | SDD         | 76      | KL21  | O3/O3a  | 0.125 | - | -  | -  |
| FE1279    | ESP | PPS  | SOD         | 147     | KL64  | O2v1    | 0.25  | - | +  | -  |
| FE1312    | ESP | Surv | SOD         | 437     | KL36  | O4      | 0.5   | 2 | +  | -  |
| FE1385    | ESP | Surv | SOD         | 323     | KL21  | O3b     | 1     | - | +  | -  |
| FE1455    | ESP | Surv | SOD         | 76      | KL21  | O3/O3a  | 2     | 1 | +  | +  |
| FE1669    | ESP | Surv | SOD         | 101     | KL17  | O1v1    | 1     | 2 | +  | ND |
| FE1762    | ESP | Surv | CHX         | 147     | KL64  | O2v1    | 0.5   | - | +  | +  |
| FE1764    | ESP | Surv | CHX         | 437     | KL36  | O4      | 0.5   | 2 | +  | +  |
| FE1825    | ESP | Surv | CHX         | 147     | KL64  | O2v1    | 1     | - | +  | +  |
| FE2000    | ESP | Surv | Wash-in/out | 1117    | KL117 | O1v1    | 1     | 2 | +  | +  |
| GL0060E   | SVN | PPS  | Baseline    | 14      | KL105 | O2v2    | 1     | 2 | -  | -  |
| GL0080E   | SVN | Surv | Baseline    | 15      | KL2   | O1v1    | 0.5   | - | +  | -  |
| GL0746E   | SVN | Surv | CHX         | 15      | KL16  | O1v1    | 0.5   | 2 | +  | -  |
| GL1380O   | SVN | PPS  | Wash-in/out | 11      | KL24  | O1v1    | 0.25  | - | -  | -  |
| GL1600E   | SVN | PPS  | SDD         | 39      | KL24  | O1v1    | 0.5   | - | +  | -  |
| GL2607E   | SVN | PPS  | SOD         | 15      | KL112 | O1v1    | 1     | - | +  | -  |
| GL2639E   | SVN | Surv | SOD         | 15      | KL24  | O1v1    | 1     | - | +  | -  |
| IT0032E   | ITA | Surv | Baseline    | 914     | KL81  | OL101   | 0.5   | - | -  | -  |
| IT0035E   | ITA | Surv | Baseline    | 15      | KL24  | O1v1    | 0.5   | - | +  | -  |
| IT0046CP1 | ITA | Surv | Baseline    | 307     | KL102 | O2v2    | 0.5   | - | +  | +  |
| IT0061O   | ITA | Surv | Baseline    | 15      | KL24  | O1v1    | 0.5   | 2 | +  | -  |
| IT0064CP  | ITA | Surv | Baseline    | 307     | KL102 | O2v2    | 1     | - | +  | +  |
| IT0067CP  | ITA | Surv | Baseline    | 307     | KL102 | O2v2    | 0.5   | 2 | +  | +  |
| IT0075CP  | ITA | Surv | Baseline    | 307     | KL102 | O2v2    | 2     | - | +  | +  |
| IT0080CP  | ITA | Surv | Baseline    | 307     | KL102 | O2v2    | 1     | - | +  | +  |
| IT0082CP3 | ITA | Surv | Baseline    | 307     | KL102 | O2v2    | 1     | - | +  | +  |
| IT0087CP  | ITA | Surv | Baseline    | 45      | KL62  | O2v1    | 0.5   | - | +  | +  |
| IT0097CP  | ITA | Surv | Baseline    | 307     | KL102 | O2v2    | 2     | - | +  | +  |
| IT0115CP  | ITA | Surv | Baseline    | 636     | KL61  | O5      | 0.5   | 1 | +  | +  |
| IT0132CP  | ITA | Surv | Baseline    | 101     | KL17  | O1v1    | 1     | - | +  | +  |
| IT0162CP  | ITA | Surv | Baseline    | 258/512 | KL107 | O2v2    | 0.25  | 2 | +  | +  |
| IT0164E   | ITA | Surv | Baseline    | 101     | KL17  | O1v1    | 0.5   | 2 | +  | -  |

|           |     |      |             |         |       |         |       |   |    |   |
|-----------|-----|------|-------------|---------|-------|---------|-------|---|----|---|
| IT0195CP  | ITA | Surv | SDD         | 307     | KL102 | O2v2    | 1     | - | +  | + |
| IT0218CP  | ITA | Surv | SDD         | 307     | KL102 | O2v2    | 2     | - | +  | + |
| IT0238CP  | ITA | Surv | SDD         | 307     | KL102 | O2v2    | 0.25  | - | +  | + |
| IT0244CP  | ITA | Surv | SDD         | 409     | KL9   | O3b     | 0.5   | 1 | +  | + |
| IT0246CP  | ITA | Surv | SDD         | 258/512 | KL107 | O2v2    | 2     | - | +  | + |
| IT0251CP  | ITA | Surv | SDD         | 307     | KL102 | O2v2    | 2     | - | +  | + |
| IT0302CP  | ITA | Surv | SDD         | 409     | KL9   | O3b     | 0.25  | 2 | +  | + |
| IT0329O   | ITA | Surv | SDD         | 409     | KL9   | O3b     | 0.125 | 2 | +  | + |
| IT0341CP  | ITA | PPS  | SDD         | 307     | KL102 | O2v2    | 2     | - | +  | + |
| IT0349O   | ITA | PPS  | SDD         | 23      | KL1   | O1v2    | 0.25  | - | -  | - |
| IT0361E   | ITA | Surv | SDD         | 307     | KL102 | O2v2    | 0.125 | 1 | +  | + |
| IT0370E   | ITA | PPS  | SOD         | 409     | KL9   | O3b     | 1     | - | +  | - |
| IT0374CP  | ITA | Surv | Wash-in/out | 101     | KL17  | O1v1    | 0.25  | - | +  | + |
| IT0385CP  | ITA | Surv | SOD         | 101     | KL17  | O1v1    | 0.25  | - | +  | + |
| IT0386CP  | ITA | Surv | SOD         | 307     | KL102 | O2v2    | 1     | - | +  | + |
| IT0394CP  | ITA | Surv | SOD         | 101     | KL17  | O1v1    | 0.5   | 2 | +  | + |
| IT0403O   | ITA | Surv | SOD         | 307     | KL102 | O2v2    | 0.125 | - | +  | - |
| IT0429    | ITA | Surv | SOD         | 101     | KL17  | O1v1    | 0.5   | - | +  | + |
| IT0444CP  | ITA | Surv | SOD         | 307     | KL102 | O2v2    | 2     | - | +  | + |
| IT0450CP2 | ITA | Surv | SOD         | 307     | KL102 | O2v2    | 0.5   | - | +  | + |
| IT0481E   | ITA | Surv | SOD         | 985     | KL39  | O1v2    | 1     | 1 | +  | - |
| IT0548E   | ITA | Surv | Interrupted | 14      | KL16  | O1v1    | 1     | - | +  | - |
| IT0591E   | ITA | Surv | Interrupted | 107     | KL103 | O1/O2v1 | 0.5   | 2 | +  | - |
| IT0598CP  | ITA | Surv | Interrupted | 353     | KL110 | O3b     | 0.5   | 2 | -  | - |
| IT0649O   | ITA | Surv | SOD         | 409     | KL9   | O3b     | 0.25  | - | +  | - |
| IT0685O   | ITA | PPS  | SOD         | 104     | KL31  | O3b     | 1     | - | -  | - |
| IT0693O   | ITA | Surv | SOD         | 45      | KL62  | O2v1    | 0.25  | - | +  | + |
| IT0700O   | ITA | Surv | SOD         | 409     | KL9   | O3b     | 2     | - | +  | - |
| IT0728CP  | ITA | PPS  | CHX         | 101     | KL17  | O1v1    | 0.25  | 2 | +  | + |
| IT0733O   | ITA | Surv | Wash-in/out | 15      | KL24  | O1v1    | 1     | 2 | +  | - |
| IT0739E   | ITA | Surv | CHX         | 409     | KL9   | O3b     | 0.25  | - | +  | - |
| IT0753CP  | ITA | Surv | CHX         | 258/512 | KL107 | O2v2    | 0.5   | - | +  | + |
| IT0758CP  | ITA | Surv | CHX         | 101     | KL17  | O1v1    | 0.5   | - | +  | + |
| IT0821    | ITA | Surv | CHX         | 258/512 | KL107 | O2v2    | 1     | - | +  | + |
| IT0846O   | ITA | Clin | CHX         | 392     | KL27  | O4      | 0.25  | 2 | +  | - |
| IT0849CP  | ITA | Surv | CHX         | 307     | KL102 | O2v2    | 1     | - | +  | + |
| IT0866CP  | ITA | Surv | CHX         | 515     | KL62  | O1v1    | 0.125 | - | +  | + |
| IT0867E   | ITA | Surv | CHX         | 515     | KL62  | O1v1    | 0.25  | 2 | +  | - |
| IT0886E   | ITA | Surv | CHX         | 409     | KL9   | O3b     | 0.5   | 2 | +  | - |
| IT0904E   | ITA | PPS  | CHX         | 14      | KL16  | O1v1    | 1     | - | ND | - |
| IT0948E   | ITA | Surv | CHX         | 16      | KL51  | O3b     | 0.5   | - | +  | - |
| IT0954O   | ITA | Surv | CHX         | 405     | KL151 | O4      | 1     | - | +  | - |
| IT0966E   | ITA | Surv | CHX         | 16      | KL51  | O3b     | 0.25  | 2 | +  | - |
| KG0086E   | BEL | Surv | Baseline    | 437     | KL36  | O4      | 1     | 2 | +  | - |
| KG0275E   | BEL | Surv | Baseline    | 15      | KL48  | O1v1    | 0.125 | - | +  | - |
| KG0312E   | BEL | Surv | SOD         | 437     | KL36  | O4      | 0.5   | 2 | +  | - |
| KG0316E   | BEL | Surv | SOD         | 15      | KL48  | O1v1    | 0.125 | 1 | +  | - |
| KG0641E   | BEL | Surv | SDD         | 15      | KL48  | O1v1    | 0.5   | - | +  | - |
| KG0663E   | BEL | PPS  | SDD         | 307     | KL102 | O2v2    | 0.5   | 2 | +  | - |
| LB0060E2  | BEL | Surv | Baseline    | 37      | KL118 | OL101   | 0.5   | - | +  | - |
| LB0063E   | BEL | Clin | Baseline    | 25      | KL2   | O1v2    | 0.5   | 2 | -  | - |
| LB0066CP  | BEL | Surv | Baseline    | 258/512 | KL107 | O2v2    | 0.25  | 1 | +  | + |
| LB0085E2  | BEL | Surv | Baseline    | 792     | KL25  | O3/O3a  | 0.5   | 2 | -  | - |
| LB0323E   | BEL | Surv | Baseline    | 15      | KL112 | O1v1    | 1     | 2 | +  | - |
| LB0343E   | BEL | PPS  | Baseline    | 556     | KL62  | O2v1    | 1     | 1 | -  | - |
| LB0464O   | BEL | Surv | Baseline    | 15      | KL24  | O1v1    | 0.5   | 2 | +  | - |
| LB0500O   | BEL | Surv | Baseline    | 4398    | KL126 | OL101   | 1     | - | -  | - |

|           |     |      |             |         |       |        |        |   |   |   |
|-----------|-----|------|-------------|---------|-------|--------|--------|---|---|---|
| LB0743O   | BEL | Surv | Baseline    | 38      | KL52  | OL101  | 1      | - | - | - |
| LB0785E   | BEL | Surv | Baseline    | 405     | KL111 | O3/O3a | 1      | 1 | + | - |
| LB1218CP  | BEL | Clin | CHX         | 258/512 | KL107 | O2v2   | 0.5    | 2 | + | + |
| LB1231E   | BEL | Surv | CHX         | 15      | KL24  | O1v1   | 0.5    | 2 | + | - |
| LB1326E   | BEL | Surv | CHX         | 11      | KL105 | O2v2   | 0.25   | - | + | - |
| LB1372E   | BEL | PPS  | CHX         | 193     | KL30  | O1v2   | 0.25   | 1 | - | - |
| LB1577E   | BEL | Surv | CHX         | Undef.  | KL151 | O4     | 1      | 2 | + | - |
| LB1695E   | BEL | Surv | CHX         | 45      | KL24  | O2v1   | 2      | 1 | - | - |
| LB1819E   | BEL | Surv | CHX         | 36      | KL27  | O2v2   | 0.125  | 2 | + | - |
| LB1945CP2 | BEL | Surv | CHX         | 258/512 | KL107 | O2v2   | 0.25   | - | + | + |
| LB1946CP  | BEL | Surv | CHX         | 258/512 | KL107 | O2v2   | 0.5    | 2 | + | + |
| LB2042E   | BEL | Surv | CHX         | 20      | KL28  | O1v2   | 1      | - | - | - |
| LB2337E   | BEL | Surv | CHX         | 348     | KL62  | O1v1   | 1      | - | + | - |
| LB2549E   | BEL | PPS  | SOD         | 193     | KL30  | O1v2   | 0.5    | 2 | + | - |
| LB2648E3  | BEL | Clin | SOD         | 17      | KL127 | OL101  | 0.5    | 2 | + | - |
| LB2711E   | BEL | Surv | SOD         | 20      | KL28  | O1v2   | 2      | - | + | - |
| LB2716E   | BEL | Surv | SOD         | 11      | KL15  | O4     | 1      | - | - | - |
| LB2737E   | BEL | Surv | SOD         | 17      | KL127 | OL101  | 0.5    | 2 | + | - |
| LB2888O4  | BEL | Surv | SOD         | 405     | KL151 | O4     | 0.5    | - | + | - |
| LB3091E   | BEL | Surv | SOD         | 25      | KL2   | O1v2   | 0.5    | 2 | + | - |
| LB3189E3  | BEL | Surv | SOD         | 1214    | KL51  | O2v2   | 1      | 2 | + | - |
| LB3246E   | BEL | Surv | SOD         | 15      | KL24  | O1v1   | 1      | - | + | - |
| LB3311CP  | BEL | Surv | SOD         | 258/512 | KL107 | O2v2   | 1      | - | + | + |
| LB3880E   | BEL | Surv | Interrupted | 405     | KL151 | O4     | 0.5    | - | + | - |
| LB4058CP  | BEL | Surv | Interrupted | 894     | KL58  | O3b    | 0.125  | - | + | + |
| LB4191E   | BEL | Surv | Interrupted | 48      | KL124 | O1v1   | 0.25   | 2 | - | - |
| LB4210E2  | BEL | Clin | Interrupted | 405     | KL151 | O4     | 0.25   | - | + | - |
| LB4438E   | BEL | PPS  | Interrupted | 17      | KL25  | O5     | 0.5    | 1 | - | - |
| LB4884E   | BEL | PPS  | SDD         | 628     | KL123 | O3b    | 1      | - | + | - |
| LB5023O   | BEL | Surv | SDD         | 147     | KL64  | O2v1   | 0.5    | - | + | - |
| LB5205CP  | BEL | Surv | SDD         | 405     | KL151 | OL102  | 1      | - | + | + |
| LB5245CP  | BEL | Surv | SDD         | 307     | KL102 | O2v2   | 0.5    | 1 | + | + |
| LB5310O   | BEL | Surv | SDD         | 15      | KL24  | O1v1   | 0.25   | 2 | + | - |
| LB5524E   | BEL | Surv | SDD         | Undef.  | KL151 | O4     | 1      | - | + | - |
| LB5773E   | BEL | Surv | SDD         | Undef.  | KL151 | O4     | 0.0625 | - | + | - |
| OT0108CP  | BEL | Surv | Baseline    | 258/512 | KL106 | O2v2   | 0.5    | - | + | + |
| OT0246E1  | BEL | Surv | Baseline    | 405     | KL151 | O4     | 0.5    | - | + | - |
| OT1141E   | BEL | Surv | SDD         | 405     | KL151 | O4     | 0.25   | - | + | - |
| OT1208E   | BEL | Surv | Wash-in/out | 35      | KL110 | O1v1   | 0.5    | - | + | - |
| OT1486E   | BEL | Surv | CHX         | 3449    | KL58  | O5     | 2      | 2 | + | - |
| OT1558E   | BEL | PPS  | CHX         | 35      | KL110 | O1v1   | 0.5    | - | + | - |
| PS0015E   | ESP | Surv | Baseline    | 326     | KL25  | O1v1   | 0.5    | 2 | + | - |
| PS0030E   | ESP | Surv | Baseline    | 11      | KL13  | O3b    | 0.5    | - | + | - |
| PS0161E   | ESP | Surv | Baseline    | 392     | KL27  | O4     | 1      | - | + | - |
| PS0202E   | ESP | Surv | Baseline    | 429     | KL27  | O4     | 0.25   | - | + | - |
| PS0230E   | ESP | Surv | Baseline    | 15      | KL19  | O1v1   | 0.125  | - | + | - |
| PS0231E   | ESP | PPS  | Baseline    | 340     | KL55  | O3b    | 2      | 1 | + | - |
| PS0304CP  | ESP | Surv | Baseline    | 258/512 | KL107 | O2v2   | 0.5    | 2 | + | + |
| PS0477CP  | ESP | Surv | Baseline    | 258/512 | KL107 | O2v2   | 0.25   | 1 | + | + |
| PS0670E   | ESP | Surv | Baseline    | 35      | KL22  | O1v1   | 0.5    | 2 | + | - |
| PS0902E   | ESP | Surv | SOD         | 11      | KL105 | O2v2   | 1      | - | + | - |
| PS1641E   | ESP | PPS  | SOD         | 15      | KL19  | O1v1   | 0.5    | - | + | - |
| PS1653E2  | ESP | PPS  | SOD         | 34      | KL117 | O2v2   | 2      | - | + | - |
| PS1684E   | ESP | Surv | SOD         | 101     | KL17  | O1v1   | 0.5    | - | - | - |
| PS1694E   | ESP | Surv | SOD         | 392     | KL27  | O4     | 1      | - | + | - |
| PS1712E1  | ESP | Surv | SOD         | 1296    | KL105 | O3b    | 1      | - | + | - |
| PS1767E   | ESP | Surv | SOD         | 2604    | KL60  | O3/O3a | 1      | 2 | + | - |

|            |     |      |             |         |       |       |       |   |   |    |
|------------|-----|------|-------------|---------|-------|-------|-------|---|---|----|
| PS1778E2   | ESP | PPS  | SOD         | 11      | KL60  | O5    | 2     | - | + | -  |
| PS1793E    | ESP | Surv | SOD         | 323     | KL21  | O3b   | 1     | - | + | -  |
| PS1812E    | ESP | Surv | CHX         | 20      | KL28  | O1v2  | 1     | - | - | -  |
| PS1901E    | ESP | Surv | CHX         | 307     | KL102 | O2v2  | 0.25  | - | + | -  |
| PS1975E    | ESP | Surv | CHX         | 326     | KL25  | O1v1  | 2     | - | + | -  |
| PS2052CP   | ESP | Surv | CHX         | 258/512 | KL107 | O2v2  | 0.25  | - | + | +  |
| PS2061E    | ESP | PPS  | CHX         | 2703    | KL16  | O3b   | 0.5   | - | + | -  |
| PS2066CP   | ESP | Surv | CHX         | 15      | KL112 | O1v1  | 1     | - | + | +  |
| PS2109E    | ESP | Surv | CHX         | 429     | KL27  | O4    | 2     | - | + | -  |
| PS2249E1   | ESP | Surv | CHX         | 3451    | KL105 | O4    | 0.5   | - | + | -  |
| PS2459E    | ESP | Surv | CHX         | 15      | KL19  | O1v2  | 1     | 2 | + | -  |
| PS2892E    | ESP | PPS  | SDD         | 556     | KL62  | O2v1  | 2     | - | - | -  |
| PS2965E    | ESP | PPS  | SDD         | 15      | KL48  | O1v1  | 1     | - | + | -  |
| PS3264E1   | ESP | Surv | SDD         | 219     | KL114 | O1v1  | 0.125 | - | + | -  |
| PS3273E1   | ESP | Surv | SDD         | 252     | KL30  | O1v1  | 1     | 1 | + | -  |
| PS3274E    | ESP | Surv | SDD         | 326     | KL25  | O1v1  | 0.5   | - | + | -  |
| PS3372E    | ESP | Surv | SDD         | 70      | KL136 | O1v2  | 1     | 1 | + | -  |
| SA0044     | PRT | Surv | Baseline    | 15      | KL19  | O1v2  | 0.5   | - | + | -  |
| SA0072     | PRT | Surv | Baseline    | 461     | KL112 | O1v2  | 0.5   | - | + | -  |
| SA0165     | PRT | Surv | Baseline    | 15      | KL19  | O1v2  | 0.25  | - | + | -  |
| SA0192     | PRT | Surv | Baseline    | 348     | KL62  | O1v1  | 0.5   | - | + | -  |
| SA0215     | PRT | Surv | Baseline    | 13      | KL3   | O1v2  | 2     | - | + | -  |
| SA0221     | PRT | Surv | Baseline    | 34      | KL10  | O1v2  | 0.25  | - | + | -  |
| SA0241     | PRT | PPS  | Baseline    | Undef.  | KL124 | OL101 | 0.5   | 2 | - | -  |
| SA0275     | PRT | Surv | Baseline    | 405     | KL151 | O4    | 0.5   | - | + | -  |
| SA0287     | PRT | Surv | Baseline    | 348     | KL62  | O1v1  | 1     | - | + | -  |
| SA0311     | PRT | Surv | Baseline    | 34      | KL10  | O2v2  | 1     | 1 | + | -  |
| SA0449     | PRT | Surv | SDD         | 307     | KL102 | O2v2  | 2     | - | + | -  |
| SA0465     | PRT | Surv | SDD         | 405     | KL151 | O4    | 1     | - | + | -  |
| SA0478     | PRT | Surv | SDD         | Undef.  | KL64  | O2v1  | 1     | - | + | +  |
| SA0483     | PRT | Surv | SDD         | 15      | KL19  | O1v2  | 0.5   | - | + | -  |
| SA0491     | PRT | Surv | SDD         | 15      | KL19  | O1v2  | 0.25  | 2 | + | -  |
| SA0517     | PRT | PPS  | CHX         | 45      | KL24  | O2v1  | 0.25  | 2 | + | -  |
| SA0528     | PRT | Surv | CHX         | 15      | KL19  | O1v2  | 1     | - | + | -  |
| SA0555     | PRT | PPS  | CHX         | 348     | KL62  | O1v1  | 0.5   | 2 | + | -  |
| SA0590     | PRT | Surv | CHX         | 11      | KL25  | O5    | 1     | - | + | +  |
| SA0690     | PRT | Surv | SOD         | 348     | KL62  | O1v1  | 0.5   | - | + | -  |
| SA0694     | PRT | Surv | SOD         | 1271    | KL28  | O1v2  | 1     | - | - | -  |
| SA0741     | PRT | Surv | SOD         | 147     | KL64  | O2v1  | 0.5   | - | + | +  |
| SA0746     | PRT | Surv | SOD         | 1695    | KL163 | O2v1  | 0.25  | 2 | + | -  |
| UZ0571E    | BEL | PPS  | Baseline    | 37      | KL38  | O3b   | 0.5   | 2 | + | -  |
| UZ0911O    | BEL | Surv | Baseline    | 11      | KL105 | O2v2  | 1     | 2 | - | -  |
| UZ1295O    | BEL | PPS  | Baseline    | 15      | KL62  | O1v1  | 1     | - | + | -  |
| UZ1812     | BEL | PPS  | Baseline    | 1565    | KL31  | O3b   | 1     | - | + | -  |
| UZ1963E    | BEL | Surv | Baseline    | 45      | KL24  | O2v1  | 2     | 1 | - | -  |
| UZ2466E    | BEL | PPS  | CHX         | 29      | KL19  | O1v2  | 0.25  | - | + | ND |
| UZ2482E    | BEL | Surv | CHX         | 307     | KL102 | O2v2  | 1     | - | + | -  |
| UZ3622E    | BEL | Surv | Interrupted | 1       | KL45  | O1v2  | 0.125 | 2 | + | -  |
| UZ4152O    | BEL | PPS  | SOD         | 37      | KL23  | O2v2  | 1     | - | + | -  |
| UZ4205E    | BEL | Clin | SOD         | 152     | KL149 | O4    | 1     | - | + | -  |
| UZ4233O1   | BEL | Surv | SOD         | 1427    | KL155 | OL101 | 1     | - | - | -  |
| UZ4601CP/E | BEL | Surv | SOD         | 1017    | KL58  | O3b   | 0.25  | 2 | + | +  |
| UZ5772O    | BEL | Surv | SDD         | 17      | KL25  | O5    | 0.5   | - | - | -  |
| UZ6482E    | BEL | Surv | SDD         | Undef.  | KL30  | O1v2  | 1     | - | - | -  |
| UZ6832E    | BEL | Clin | SDD         | 152     | KL149 | O4    | 0.25  | 2 | + | -  |
| UZ6865O    | BEL | Surv | SDD         | Undef.  | KL30  | O1v2  | 1     | - | - | -  |
| VR0060E    | PRT | Surv | Baseline    | 307     | KL102 | O2v2  | 0.125 | - | + | -  |

|                  |     |      |          |     |       |      |        |   |   |   |
|------------------|-----|------|----------|-----|-------|------|--------|---|---|---|
| <b>VR0062E</b>   | PRT | Surv | Baseline | 45  | KL24  | O2v1 | 1      | - | + | - |
| <b>VR0144E</b>   | PRT | Surv | Baseline | 307 | KL19  | O1v2 | 1      | - | + | - |
| <b>VR0231E</b>   | PRT | Surv | SDD      | 34  | KL10  | O1v1 | 1      | 2 | + | - |
| <b>VR0321E</b>   | PRT | Surv | SDD      | 4   | KL128 | O3b  | 0.0625 | - | + | + |
| <b>VR0382CP</b>  | PRT | Surv | SOD      | 922 | KL64  | O2v1 | 0.5    | - | + | + |
| <b>VR0452E</b>   | PRT | Surv | SOD      | 147 | KL23  | O2v2 | 0.5    | 2 | + | - |
| <b>VR0533E</b>   | PRT | Clin | SOD      | 280 | KL64  | O2v1 | 1      | - | + | - |
| <b>VR0556E</b>   | PRT | Clin | SOD      | 377 | KL15  | O4   | 1      | - | + | - |
| <b>VR0588E/C</b> | PRT | Clin | SOD      | 34  | KL64  | O2v1 | 0.25   | 2 | + | + |
| <b>VR0601E</b>   | PRT | Surv | CHX      | 147 | KL1   | O1v2 | 0.5    | - | + | + |
| <b>VR0664E</b>   | PRT | Surv | CHX      | 15  | KL10  | O2v2 | 0.25   | 1 | + | + |
| <b>VR0750E</b>   | PRT | Surv | CHX      | 34  | KL25  | O5   | 0.25   | 2 | + | - |
| <b>VR0774E</b>   | PRT | Surv | CHX      | 11  | KL17  | O1v1 | 2      | - | + | + |
| <b>VR0782E</b>   | PRT | Surv | CHX      | 870 | KL102 | O2v2 | 0.5    | 2 | + | + |
