# Supplementary material for: Assessment of Colistin Heteroresistance among Multidrug-Resistant Klebsiella pneumoniae Isolated from Intensive Care Patients in Europe
Source: MDPI journal article supplement (doi:10.3390/antibiotics13030281), 2024-03-20
Supplement: s1 [file s1]

**Table S4:** Number of MDR and CP-Kpn isolates. Tables gives summary of the number of MDR and CP-Kpn selected CS and CHR isolates. For CS, MDR, and CP-Kpn, classification was not possible for four and three isolates, respectively, of which one isolate was also CHR following C2. For CHR, C1+C2 represents the total amount of isolates fulfilling C2 whilst C2 alone represents isolates only fulfilling C2. CS = colistin-susceptible, CHR = colistin-heteroresistant, C1 = Classification 1, C2 = Classification 2, MDR = multidrug-resistant, CP-Kpn = carbapenemase-producing *K. pneumoniae*.

|                          | Total | MDR |    | CP-Kpn |     |
|--------------------------|-------|-----|----|--------|-----|
|                          |       | +   | -  | +      | -   |
| <b>CS<br/>(selected)</b> | 288   | 244 | 40 | 80     | 205 |
| <b>CHR C1</b>            | 25    | 19  | 6  | 9      | 16  |
| <b>CHR C2</b>            | 83    | 72  | 10 | 23     | 59  |
