# Supplementary material for: Assessment of Colistin Heteroresistance among Multidrug-Resistant Klebsiella pneumoniae Isolated from Intensive Care Patients in Europe
Source: MDPI journal article supplement (doi:10.3390/antibiotics13030281), 2024-03-20
Supplement: s1 [file s1]

**Table S3:** Number of MDR and CP-Kpn isolates. Tables gives summary of the number of MDR and CP-Kpn CS and CR isolates. For CS, MDR, and CP-Kpn, classification was not possible for five and three isolates, respectively. CS = colistin-susceptible, CR = colistin-resistant, MDR = multidrug-resistant, CP-Kpn = carbapenemase-producing *K. pneumoniae*.

|           | Total | MDR |    | CP-Kpn |     |
|-----------|-------|-----|----|--------|-----|
|           |       | +   | -  | +      | -   |
| <b>CS</b> | 597   | 539 | 53 | 174    | 420 |
| <b>CR</b> | 79    | 78  | 1  | 57     | 22  |
